# Supplementary material for: Magnesium sulfate and fetal neuroprotection: overview of clinical evidence
Source: PubMed Central journal article supplement — Neural Regen Res. 2018 Dec;13(12):2044–9. doi: 10.4103/1673-5374.241441 (PMC6199933; doi:10.4103/1673-5374.241441), 2018-12
Supplement: NRR-13-2044_Suppl1.pdf [file NRR-13-2044_Suppl1.pdf]

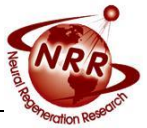

## PEER-REVIEW REPORT 1

**Name of journal:** Neural Regeneration Research

**Manuscript NO:** NRR-D-18-00413

**Title:** Magnesium sulfate and fetal neuroprotection: overview of clinical evidence

**Reviewer's Name:** Creed Stary

**Reviewer's country:** USA

**Date sent for review:** 2018-06-20

**Date reviewed:** 2018-07-06

**Review time:** 16 Days

### COMMENTS TO AUTHORS

In the present study the Authors present a review article summarizing evidence for antenatal neuroprotection with MgSO<sub>4</sub>. They review 5 RCTs and available original clinical studies, highlighting the benefit of MgSO<sub>4</sub> for neuroprotection and preeclampsia, and absence of adverse effects in both pregnant women and neonates. They conclude that post-natal administration is under evaluated and recommend future RCTs are needed to evaluate the effect in neuroprotection.

The Review is comprehensive and well-written, although there are intermittent English Language errors (*i.e* "evidences" is not a word) and general formatting errors (new paragraphs not indented, spacing not consistent throughout). The article would also benefit from a summary on the proposed mechanisms of action of MgSO<sub>4</sub> in neuroprotection.
